# Supplementary material for: Co-revolving topological defects in a nematic liquid crystal
Source: Royal Society of Chemistry journal article supplement (doi:10.1039/d1sm01124c), 2021-01-01
Supplement: d1sm01124c3.pdf [file d1sm01124c3.pdf]

### Supplemental Videos

The three supplemental videos show the defect pair at frequency  $\nu = 250$  Hz and three different applied fields:

1. StableDefectGS,  $3.5 \times 10^6 \text{ V m}^{-1}$  ( $E < E_{\text{rev1}}$ )
2. WobbleGS,  $5.7 \times 10^6 \text{ V m}^{-1}$  ( $E_{\text{rev1}} < E < E_{\text{rev2}}$ )
3. CoRevDefectGS,  $6.5 \times 10^6 \text{ V m}^{-1}$  ( $E > E_{\text{rev3}}$ )
